# Supplementary material for: Molecular Mechanisms and Timing of Cortical Immune Activation in Schizophrenia
Source: Atypon-hosted journal article supplement (doi:10.1176/appi.ajp.2015.15010019), 2015-07-02
Supplement: appi.ajp.2015.15010019.ds001.pdf [file appi.ajp.2015.15010019.ds001.pdf]

## Supplemental Figure Legends

**Supplemental Figure S1. Serum cytokine levels after acute/subacute exposure to immune stimulation in adult mice.** Serum IL-6 levels obtained from trunk blood were quantified by ELISA in adult female mice exposed to either normal saline (n=8; black column) or poly(I:C) (n=8; gray column) daily for 3 days. Bar graph indicates group mean and error bar indicates standard deviation. Asterisk indicates  $p < 0.05$ .

Supplementary Figure S1

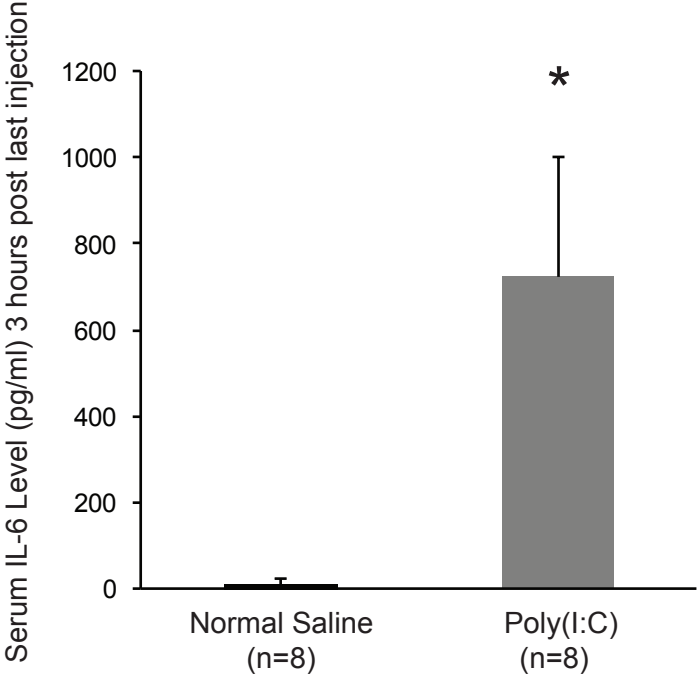

**Table S1. Demographic, postmortem, and clinical characteristics of human subjects used in this study.**

| Healthy Comparison Subjects |       |              |     |                  |                              |     |     |                             | Subjects with Schizophrenia |                                                  |              |     |                  |                              |     |     |                                     |               |                 |                            |                             |                                           |
|-----------------------------|-------|--------------|-----|------------------|------------------------------|-----|-----|-----------------------------|-----------------------------|--------------------------------------------------|--------------|-----|------------------|------------------------------|-----|-----|-------------------------------------|---------------|-----------------|----------------------------|-----------------------------|-------------------------------------------|
| Pair                        | Case  | Sex/<br>Race | Age | PMI <sup>a</sup> | Storage<br>Time <sup>b</sup> | RIN | pH  | Cause of Death              | Case                        | DSM IV diagnosis                                 | Sex/<br>Race | Age | PMI <sup>a</sup> | Storage<br>Time <sup>b</sup> | RIN | pH  | Cause of Death                      | NSAID<br>ATOD | Tobacco<br>ATOD | Anti-<br>psychotic<br>ATOD | Anti-<br>depressant<br>ATOD | Benzodiazepine/<br>Anticonvulsant<br>ATOD |
| 1                           | 592   | M/B          | 41  | 22.1             | 212                          | 9.0 | 6.7 | ASCVD                       | 533                         | Chronic undifferentiated schizophrenia           | M/W          | 40  | 29.1             | 222                          | 8.4 | 6.8 | Accidental Asphyxiation             | No            | Unknown         | Yes                        | No                          | No                                        |
| 2                           | 567   | F/W          | 46  | 15.0             | 214                          | 8.9 | 6.7 | Mitral valve prolapse       | 537                         | Schizoaffective disorder                         | F/W          | 37  | 14.5             | 219                          | 8.6 | 6.7 | Suicide by hanging                  | No            | Unknown         | No                         | No                          | No                                        |
| 3                           | 516   | M/B          | 20  | 14.0             | 222                          | 8.4 | 6.9 | Homicide by gun shot        | 547                         | Schizoaffective disorder                         | M/B          | 27  | 16.5             | 218                          | 7.4 | 7.0 | Heat Stroke                         | No            | Unknown         | Yes                        | Yes                         | Yes                                       |
| 4                           | 630   | M/W          | 65  | 21.2             | 205                          | 9.0 | 7.0 | ASCVD                       | 566                         | Chronic undifferentiated schizophrenia; AAR      | M/W          | 63  | 18.3             | 215                          | 8.0 | 6.8 | ASCVD                               | No            | Yes             | Yes                        | Yes                         | Yes                                       |
| 5                           | 604   | M/W          | 39  | 19.3             | 208                          | 8.6 | 7.1 | Hypoplastic coronary artery | 581                         | Chronic paranoid schizophrenia; ADC; OAC         | M/W          | 46  | 28.1             | 213                          | 7.9 | 7.2 | Accidental combined drug overdose   | No            | Unknown         | Yes                        | No                          | Yes                                       |
| 6                           | 546   | F/W          | 37  | 23.5             | 220                          | 8.6 | 6.7 | ASCVD                       | 587                         | Chronic undifferentiated schizophrenia; AAR      | F/B          | 38  | 17.8             | 213                          | 9.0 | 7.0 | Myocardial hypertrophy              | No            | Yes             | Yes                        | No                          | Yes                                       |
| 7                           | 551   | M/W          | 61  | 16.4             | 219                          | 8.3 | 6.6 | Cardiac tamponade           | 625                         | Chronic disorganized schizophrenia; AAC          | M/B          | 49  | 23.5             | 207                          | 7.6 | 7.3 | ASCVD                               | No            | Yes             | Yes                        | Yes                         | No                                        |
| 8                           | 685   | M/W          | 56  | 14.5             | 198                          | 8.1 | 6.6 | Hypoplastic coronary artery | 622                         | Chronic undifferentiated schizophrenia           | M/W          | 58  | 18.9             | 205                          | 7.4 | 6.8 | Right MCA infarction                | No            | Unknown         | No                         | No                          | No                                        |
| 9                           | 681   | M/W          | 51  | 11.6             | 200                          | 8.9 | 7.2 | Hypertrophic cardiomyopathy | 640                         | Chronic paranoid schizophrenia                   | M/W          | 49  | 5.2              | 205                          | 8.4 | 6.9 | Pulmonary embolism                  | No            | Unknown         | Yes                        | Yes                         | No                                        |
| 10                          | 806   | M/W          | 57  | 24.0             | 177                          | 7.8 | 6.9 | Pulmonary embolism          | 665                         | Chronic paranoid schizophrenia; ADC              | M/B          | 59  | 28.1             | 201                          | 9.2 | 6.9 | Intestinal hemorrhage               | No            | Yes             | Yes                        | Yes                         | No                                        |
| 11                          | 822   | M/B          | 28  | 25.3             | 174                          | 8.5 | 7.0 | ASCVD                       | 787                         | Schizoaffective disorder; ODC                    | M/B          | 27  | 19.2             | 181                          | 8.4 | 6.7 | Suicide by gun shot                 | No            | No              | Yes                        | No                          | No                                        |
| 12                          | 727   | M/B          | 19  | 7.0              | 192                          | 9.2 | 7.2 | Trauma                      | 829                         | Schizoaffective disorder; ADC; OAR               | M/W          | 25  | 5.0              | 172                          | 9.3 | 6.8 | Suicide by salicylate overdose      | Yes           | Yes             | No                         | No                          | Yes                                       |
| 13                          | 871   | M/W          | 28  | 16.5             | 165                          | 8.5 | 7.1 | Trauma                      | 878                         | Disorganized schizophrenia; ADC                  | M/W          | 33  | 10.8             | 165                          | 8.9 | 6.7 | Myocardial fibrosis                 | No            | Yes             | Yes                        | Yes                         | Yes                                       |
| 14                          | 575   | F/B          | 55  | 11.3             | 215                          | 9.6 | 6.8 | ASCVD                       | 517                         | Disorganized schizophrenia; ADC                  | F/W          | 48  | 3.7              | 224                          | 9.3 | 6.7 | Intracerebral hemorrhage            | No            | Yes             | Yes                        | No                          | No                                        |
| 15                          | 700   | M/W          | 42  | 26.1             | 196                          | 8.7 | 7.0 | ASCVD                       | 539                         | Schizoaffective disorder; ADR                    | M/W          | 50  | 40.5             | 220                          | 8.1 | 7.1 | Suicide by combined drug overdose   | Yes           | Unknown         | Yes                        | Yes                         | Yes                                       |
| 16                          | 988   | M/W          | 82  | 22.5             | 144                          | 8.4 | 6.2 | Trauma                      | 621                         | Chronic undifferentiated schizophrenia           | M/W          | 83  | 16.0             | 208                          | 8.7 | 7.3 | Accidental asphyxiation             | No            | Unknown         | No                         | No                          | No                                        |
| 17                          | 686   | F/W          | 52  | 22.6             | 199                          | 8.5 | 7.0 | ASCVD                       | 656                         | Schizoaffective disorder; ADC                    | F/B          | 47  | 20.1             | 204                          | 9.2 | 7.3 | Suicide by gun shot                 | Yes           | Yes             | Yes                        | No                          | No                                        |
| 18                          | 634   | M/W          | 52  | 16.2             | 206                          | 8.5 | 7.0 | ASCVD                       | 722                         | Chronic undifferentiated schizophrenia; ODR; OAR | M/B          | 45  | 9.1              | 194                          | 9.2 | 6.7 | Upper GI bleeding                   | No            | Yes             | Yes                        | No                          | No                                        |
| 19                          | 852   | M/W          | 54  | 8.0              | 167                          | 9.1 | 6.8 | Cardiac tamponade           | 781                         | Schizoaffective disorder; ADR                    | M/B          | 52  | 8.0              | 182                          | 7.7 | 6.7 | Peritonitis                         | No            | Yes             | Yes                        | Yes                         | No                                        |
| 20                          | 987   | F/W          | 65  | 21.5             | 144                          | 9.1 | 6.8 | ASCVD                       | 802                         | Schizoaffective disorder; ADC; ODR               | F/W          | 63  | 29.0             | 179                          | 9.2 | 6.4 | Right ventricular dysplasia         | No            | Yes             | Yes                        | No                          | Yes                                       |
| 21                          | 818   | F/W          | 67  | 24.0             | 176                          | 8.4 | 7.1 | Anaphylactic reaction       | 917                         | Chronic undifferentiated schizophrenia           | F/W          | 71  | 23.8             | 156                          | 7.0 | 6.8 | ASCVD                               | No            | Yes             | Yes                        | No                          | No                                        |
| 22                          | 857   | M/W          | 48  | 16.6             | 166                          | 8.9 | 6.7 | ASCVD                       | 930                         | Disorganized schizophrenia; ADR; OAR             | M/W          | 47  | 15.3             | 152                          | 8.2 | 6.2 | ASCVD                               | No            | Yes             | Yes                        | No                          | Yes                                       |
| 23                          | 739   | M/W          | 40  | 15.8             | 191                          | 8.4 | 6.9 | ASCVD                       | 933                         | Disorganized schizophrenia                       | M/W          | 44  | 8.3              | 152                          | 8.1 | 5.9 | Myocarditis                         | No            | No              | Yes                        | Yes                         | Yes                                       |
| 24                          | 1047  | M/W          | 43  | 13.8             | 133                          | 9.0 | 6.6 | ASCVD                       | 1209                        | Schizoaffective disorder                         | M/W          | 35  | 9.1              | 114                          | 8.7 | 6.5 | Suicide by diphenhydramine overdose | Yes           | No              | Yes                        | No                          | No                                        |
| 25                          | 1086  | M/W          | 51  | 24.2             | 129                          | 8.1 | 6.8 | ASCVD                       | 10025                       | Disorganized schizophrenia; OAR                  | M/B          | 52  | 27.1             | 108                          | 7.8 | 6.7 | ASCVD                               | No            | Yes             | No                         | No                          | No                                        |
| 26                          | 1092  | F/B          | 40  | 16.6             | 127                          | 8.0 | 6.8 | Mitral valve prolapse       | 1178                        | Schizoaffective disorder                         | F/B          | 37  | 18.9             | 118                          | 8.4 | 6.1 | Pulmonary embolism                  | No            | Yes             | Yes                        | No                          | Yes                                       |
| 27                          | 10005 | M/W          | 42  | 23.5             | 116                          | 7.4 | 6.7 | Trauma                      | 1256                        | Undifferentiated schizophrenia                   | M/W          | 34  | 27.4             | 108                          | 7.9 | 6.4 | Suicide by hanging                  | No            | No              | Yes                        | No                          | No                                        |
| 28                          | 1336  | M/W          | 65  | 18.4             | 92                           | 8.0 | 6.8 | Cardiac tamponade           | 1173                        | Disorganized schizophrenia; ADR                  | M/W          | 62  | 22.9             | 118                          | 7.7 | 6.4 | ASCVD                               | No            | Yes             | Yes                        | No                          | No                                        |
| 29                          | 1122  | M/W          | 55  | 15.4             | 123                          | 7.9 | 6.7 | Cardiac tamponade           | 1105                        | Schizoaffective disorder                         | M/W          | 53  | 7.9              | 125                          | 8.9 | 6.2 | ASCVD                               | No            | Yes             | Yes                        | No                          | No                                        |

| Healthy Comparison Subjects |       |              |     |                  |                              |     |     |                         | Subjects with Schizophrenia |                                          |              |     |                  |                              |     |     |                                   |               |                 |                            |                             |                                        |
|-----------------------------|-------|--------------|-----|------------------|------------------------------|-----|-----|-------------------------|-----------------------------|------------------------------------------|--------------|-----|------------------|------------------------------|-----|-----|-----------------------------------|---------------|-----------------|----------------------------|-----------------------------|----------------------------------------|
| Pair                        | Case  | Sex/<br>Race | Age | PMI <sup>a</sup> | Storage<br>Time <sup>b</sup> | RIN | pH  | Cause of Death          | Case                        | DSM IV diagnosis                         | Sex/<br>Race | Age | PMI <sup>a</sup> | Storage<br>Time <sup>b</sup> | RIN | pH  | Cause of Death                    | NSAID<br>ATOD | Tobacco<br>ATOD | Anti-<br>psychotic<br>ATOD | Anti-<br>depressant<br>ATOD | Benzodiazepine/<br>Anticonvulsant ATOD |
| 30                          | 1284  | M/W          | 55  | 6.4              | 102                          | 8.7 | 6.8 | ASCVD                   | 1188                        | Undifferentiated schizophrenia; AAR; OAR | M/W          | 58  | 7.7              | 117                          | 8.4 | 6.2 | ASCVD                             | No            | Yes             | Yes                        | No                          | No                                     |
| 31                          | 1191  | M/B          | 59  | 19.4             | 118                          | 8.4 | 6.2 | ASCVD                   | 1263                        | Undifferentiated schizophrenia; ADR      | M/W          | 62  | 22.7             | 108                          | 8.5 | 7.1 | Accidental asphyxiation           | Yes           | Yes             | Yes                        | Yes                         | No                                     |
| 32                          | 970   | M/W          | 42  | 25.9             | 145                          | 7.2 | 6.4 | ASCVD                   | 1222                        | Undifferentiated schizophrenia; AAC      | M/W          | 32  | 30.8             | 112                          | 7.5 | 6.4 | Suicide by combined drug overdose | No            | No              | Yes                        | Yes                         | No                                     |
| 33                          | 10003 | M/W          | 49  | 21.2             | 116                          | 8.4 | 6.5 | Trauma                  | 1088                        | Undifferentiated schizophrenia; ADC; OAC | M/W          | 49  | 21.5             | 127                          | 8.1 | 6.5 | Accidental combined drug overdose | No            | Yes             | Yes                        | Yes                         | No                                     |
| 34                          | 1247  | F/W          | 58  | 22.7             | 108                          | 8.4 | 6.4 | ASCVD                   | 1240                        | Undifferentiated schizophrenia; ADR      | F/B          | 50  | 22.9             | 109                          | 7.7 | 6.3 | ASCVD                             | Yes           | Yes             | Yes                        | No                          | No                                     |
| 35                          | 1324  | M/W          | 43  | 22.3             | 94                           | 7.3 | 7   | Aortic dissection       | 10020                       | Schizophrenia, paranoid type; AAC; OAC   | M/W          | 38  | 28.8             | 108                          | 7.4 | 6.6 | Suicide by salicylate overdose    | Yes           | Yes             | Yes                        | Yes                         | Yes                                    |
| 36                          | 1099  | F/W          | 24  | 9.1              | 126                          | 8.6 | 6.5 | Cardiomyopathy          | 10023                       | Disorganized schizophrenia               | F/B          | 25  | 20.1             | 107                          | 7.4 | 6.7 | Suicide by drowning               | No            | No              | Yes                        | No                          | Yes                                    |
| 37                          | 1307  | M/B          | 32  | 4.8              | 97                           | 7.6 | 6.7 | ASCVD                   | 10024                       | Paranoid schizophrenia                   | M/B          | 37  | 6.0              | 107                          | 7.5 | 6.1 | ASCVD                             | Yes           | No              | No                         | No                          | No                                     |
| 38                          | 1391  | F/W          | 51  | 7.8              | 85                           | 7.1 | 6.6 | ASCVD                   | 1189                        | Schizoaffective disorder; AAR            | F/W          | 47  | 14.4             | 119                          | 8.3 | 6.4 | Suicide by combined drug overdose | Yes           | Yes             | Yes                        | Yes                         | Yes                                    |
| 39                          | 1282  | F/W          | 39  | 24.5             | 105                          | 7.5 | 6.8 | ASCVD                   | 1211                        | Schizoaffective disorder                 | F/W          | 41  | 20.1             | 116                          | 7.8 | 6.3 | Sudden unexplained death          | Yes           | Yes             | Yes                        | Yes                         | No                                     |
| 40                          | 1159  | M/W          | 51  | 16.7             | 122                          | 7.6 | 6.5 | ASCVD                   | 1296                        | Undifferentiated schizophrenia           | M/W          | 48  | 7.8              | 102                          | 7.3 | 6.5 | Pneumonia                         | No            | Yes             | Yes                        | Yes                         | No                                     |
| 41                          | 1326  | M/W          | 58  | 16.4             | 96                           | 8.0 | 6.7 | ASCVD                   | 1314                        | Undifferentiated schizophrenia           | M/W          | 50  | 11.0             | 99                           | 7.2 | 6.2 | ASCVD                             | Yes           | No              | Yes                        | Yes                         | No                                     |
| 42                          | 902   | M/W          | 60  | 23.6             | 161                          | 7.7 | 6.7 | ASCVD                   | 1361                        | Schizoaffective disorder; ODC            | M/W          | 63  | 23.2             | 91                           | 7.7 | 6.4 | Cardiomyopathy                    | No            | Yes             | Yes                        | No                          | Yes                                    |
| 43                          | 1374  | M/W          | 43  | 21.7             | 88                           | 7.2 | 6.6 | ASCVD                   | 904                         | Schizoaffective disorder                 | M/W          | 33  | 28.0             | 160                          | 7.1 | 6.2 | Pneumonia                         | No            | Yes             | Yes                        | No                          | Yes                                    |
| 44                          | 1555  | M/W          | 17  | 15.1             | 53                           | 7.9 | 6.9 | Trauma                  | 1649                        | Undifferentiated schizophrenia           | M/B          | 17  | 21.4             | 39                           | 8.1 | 6.9 | Suicide by hanging                | No            | No              | Yes                        | Yes                         | No                                     |
| 45                          | 1268  | M/B          | 49  | 19.9             | 106                          | 7.9 | 7.1 | ASCVD                   | 1230                        | Undifferentiated schizophrenia           | M/W          | 50  | 16.9             | 111                          | 8.2 | 6.6 | Suicide by doxepin overdose       | No            | Yes             | Yes                        | Yes                         | No                                     |
| 46                          | 1466  | F/B          | 64  | 20.0             | 72                           | 8.8 | 6.7 | Trauma                  | 1341                        | Schizoaffective disorder; ODC            | F/W          | 44  | 24.5             | 93                           | 8.8 | 6.6 | Trauma                            | No            | No              | Yes                        | No                          | Yes                                    |
| 47                          | 1518  | M/W          | 50  | 20.7             | 61                           | 7.7 | 6.4 | ASCVD                   | 1367                        | Schizoaffective disorder; ADC; ODR       | M/W          | 47  | 28.9             | 91                           | 7.2 | 6.6 | Combined drug overdose            | No            | No              | No                         | No                          | No                                     |
| 48                          | 1386  | M/W          | 46  | 21.2             | 86                           | 8.3 | 6.7 | ASCVD                   | 1420                        | Schizoaffective disorder; AAR; ODC; OAR  | M/W          | 47  | 23.4             | 80                           | 8.2 | 6.8 | Suicide by jump                   | No            | Yes             | Yes                        | Yes                         | No                                     |
| 49                          | 1472  | M/W          | 61  | 23.8             | 70                           | 8.0 | 6.5 | Pulmonary embolism      | 1453                        | Paranoid schizophrenia; ADR              | M/W          | 62  | 11.1             | 73                           | 8.2 | 6.4 | Trauma                            | No            | Yes             | Yes                        | No                          | Yes                                    |
| 50                          | 1026  | M/W          | 59  | 19.8             | 137                          | 7.4 | 6.3 | ASCVD                   | 1454                        | Paranoid schizophrenia; AAR; ODC         | M/W          | 59  | 24.1             | 72                           | 7.6 | 6.1 | Trauma                            | Yes           | Yes             | Yes                        | Yes                         | No                                     |
| 51                          | 694   | M/W          | 38  | 20.7             | 198                          | 7.7 | 7.0 | Subarachnoid hemorrhage | 1455                        | Paranoid schizophrenia; AAR; OAC         | M/W          | 42  | 8.2              | 72                           | 7.7 | 6.4 | Peritonitis                       | Yes           | Yes             | Yes                        | No                          | Yes                                    |
| 52                          | 1350  | M/W          | 21  | 24.2             | 92                           | 7.3 | 6.4 | Trauma                  | 1474                        | Schizoaffective disorder; ADR            | M/W          | 37  | 39.9             | 70                           | 7.0 | 6.7 | Suicide by hanging                | No            | No              | No                         | No                          | No                                     |
| 53                          | 1792  | F/W          | 36  | 28.1             | 14                           | 7.5 | 6.5 | Pulmonary embolism      | 1506                        | Schizoaffective disorder; ADC            | F/W          | 47  | 14.1             | 65                           | 7.5 | 6.6 | Combined drug overdose            | No            | Yes             | Yes                        | Yes                         | No                                     |
| 54                          | 1524  | M/W          | 66  | 9.4              | 58                           | 8.1 | 6.4 | Intestinal infarction   | 1542                        | Paranoid schizophrenia                   | M/W          | 65  | 17.4             | 55                           | 7.8 | 6.7 | Combined drug overdose            | No            | Yes             | Yes                        | Yes                         | Yes                                    |
| 55                          | 1270  | F/W          | 73  | 19.7             | 106                          | 7.7 | 6.7 | Trauma                  | 1579                        | Schizoaffective disorder; ADR; ODC       | F/W          | 69  | 16.1             | 49                           | 7.7 | 6.7 | ASCVD                             | No            | Yes             | Yes                        | No                          | Yes                                    |
| 56                          | 1372  | M/W          | 37  | 20.5             | 89                           | 9.0 | 6.6 | Asphyxiation            | 1581                        | Paranoid schizophrenia; ODC; OAC         | M/W          | 32  | 18.4             | 49                           | 9.0 | 6.8 | ASCVD                             | No            | Yes             | Yes                        | Yes                         | No                                     |
| 57                          | 1543  | F/W          | 45  | 17.9             | 55                           | 7.4 | 6.8 | Subarachnoid hemorrhage | 10026                       | Undifferentiated schizophrenia           | F/W          | 46  | 23.8             | 108                          | 7.6 | 6.6 | Suicide by thermal injuries       | No            | Yes             | Yes                        | Yes                         | No                                     |
| 58                          | 1583  | M/W          | 58  | 19.1             | 49                           | 8.2 | 6.8 | Trauma                  | 1686                        | Schizophrenia, paranoid type; AAR        | M/B          | 56  | 14.1             | 32                           | 8.3 | 6.2 | ASCVD                             | No            | Yes             | Yes                        | Yes                         | Yes                                    |
| 59                          | 1554  | M/W          | 50  | 23.2             | 55                           | 7.6 | 6.5 | ASCVD                   | 1691                        | Schizophrenia, paranoid type; ADR; ODC   | M/W          | 51  | 31.9             | 31                           | 7.7 | 6.6 | Combined drug overdose            | Yes           | Yes             | Yes                        | No                          | Yes                                    |

| Healthy Comparison Subjects |      |              |      |                  |                              |     |     |                   | Subjects with Schizophrenia |                                                           |              |      |                  |                              |     |     |                |               |                  |                            |                             |                                           |
|-----------------------------|------|--------------|------|------------------|------------------------------|-----|-----|-------------------|-----------------------------|-----------------------------------------------------------|--------------|------|------------------|------------------------------|-----|-----|----------------|---------------|------------------|----------------------------|-----------------------------|-------------------------------------------|
| Pair                        | Case | Sex/<br>Race | Age  | PMI <sup>a</sup> | Storage<br>Time <sup>b</sup> | RIN | pH  | Cause of Death    | Case                        | DSM IV diagnosis                                          | Sex/<br>Race | Age  | PMI <sup>a</sup> | Storage<br>Time <sup>b</sup> | RIN | pH  | Cause of Death | NSAID<br>ATOD | Tobacco<br>ATOD  | Anti-<br>psychotic<br>ATOD | Anti-<br>depressant<br>ATOD | Benzodiazepine/<br>Anticonvulsant<br>ATOD |
| 60                          | 1635 | M/W          | 66   | 25.3             | 42                           | 8.2 | 6.8 | Cardiac tamponade | 1706                        | Schizoaffective disorder;<br>AAR; ODC; OAR                | M/B          | 60   | 28.1             | 28                           | 8.4 | 6.8 | Sepsis         | No            | Yes              | Yes                        | No                          | No                                        |
| 61                          | 1384 | M/W          | 67   | 21.9             | 87                           | 7.0 | 6.6 | ASCVD             | 1712                        | Schizoaffective disorder;<br>ADR; ODC                     | M/W          | 63   | 15.1             | 26                           | 7.1 | 6.2 | ASCVD          | Yes           | No               | Yes                        | Yes                         | Yes                                       |
| 62                          | 1558 | M/W          | 54   | 24.4             | 54                           | 7.7 | 6.9 | ASCVD             | 1734                        | Schizophrenia,<br>undifferentiated type; AAR;<br>ODC; OAR | M/W          | 54   | 28.6             | 23                           | 7.7 | 6.1 | Pneumonia      | Yes           | Yes              | Yes                        | No                          | No                                        |
|                             | Mean | 48.7         | 18.8 | 131.8            | 8.2                          | 6.7 |     |                   |                             |                                                           |              | 47.7 | 19.2             | 128.1                        | 8.1 | 6.6 |                | 16Y/46N       | 41Y/13N/<br>8Unk | 54Y/8N                     | 27Y/35N                     | 24Y/38N                                   |
|                             | SD   | 13.8         | 5.5  | 56.2             | 0.6                          | 0.2 |     |                   |                             |                                                           |              | 12.7 | 8.5              | 60.7                         | 0.6 | 0.3 |                |               |                  |                            |                             |                                           |

<sup>a</sup>PMI, postmortem interval (hours); <sup>b</sup> Storage time (months) at -80C; Other abbreviations: ASCVD, arteriosclerotic cardiovascular disease; MCA, middle cerebral artery; ATOD, at time of death; ADC, alcohol dependence, current at time of death; ADR, alcohol dependence, in remission at time of death; AAC, alcohol abuse, current at time of death; AAR, alcohol abuse, in remission at time of death; ODC, other substance dependence, current at time of death; ODR, other substance dependence, in remission at time of death; OAC, other substance abuse, current at time of death; OAR, other substance abuse, in remission at time of death; U, unknown; M, male; F, female; W, white; B, black.

**Supplemental Table S2: qPCR primer design**

| Gene                                                         | Species         | Accession #  | Amplicon Size (bp) | Position  | Forward Primer (F)<br>Reverse Primer (R)               |
|--------------------------------------------------------------|-----------------|--------------|--------------------|-----------|--------------------------------------------------------|
| Interleukin-1 $\beta$<br>(IL-1B)                             | Human           | NM_000576    | 115                | 304-418   | (F) AAGCTGAGGAAGATGCTGGT<br>(R) CGTTATCCCATGTGTGCGAAG  |
| Interleukin-6<br>(IL-6)                                      | Human           | NM_000600    | 50                 | 535-584   | (F) CCAGAGCTGTGCAGATGAGT<br>(R) TTTCTGCAGGAACTGGATCA   |
| Interleukin-8<br>(IL-8)                                      | Human           | NM_000584    | 86                 | 205-290   | (F) GCTCTGTGTGAAGGTGCAGT<br>(R) GGTGGAAAGTTTGGAGTA     |
| Interferon- $\beta$                                          | Human           | NM_002176    | 130                | 362-491   | (F) CTAGCACTGGCTGGAATGAG<br>(R) CTCATGAGTTTCCCTGGT     |
| Nuclear factor- $\kappa$ B<br>isoform 1<br>(NF- $\kappa$ B1) | Human           | NM_003998    | 143                | 819-961   | (F) CACTGTGAGGATGGGATCTG<br>(R) CCCCTTATACACGCCTCTGT   |
| Nuclear factor- $\kappa$ B<br>isoform 2<br>(NF- $\kappa$ B2) | Human           | NM_001077494 | 122                | 960-1081  | (F) TCTCGAATGGACAAGACAGC<br>(R) TGCCATCCATTCTCATCATC   |
| Schnurri-2                                                   | Human           | NM_006734    | 148                | 1610-1757 | (F) CGAGGCTTCTGACAAAATGA<br>(R) AGGGAGAGGAATCCCCTTT    |
| Beta actin                                                   | Human           | NM_001101    | 101                | 1146-1246 | (F) GATGTGGATCAGCAAGCA<br>(R) AGAAAGGGGTGTAACGCAACTA   |
| Cyclophilin                                                  | Human           | NM_021130    | 126                | 159-284   | (F) GCAGACAAGGTCCCAAAG<br>(R) GAAGTCACCACCCTGACAAC     |
| Glyceraldehyde-3-<br>phosphate<br>dehydrogenase<br>(GAPDH)   | Human           | NM_002046    | 87                 | 556-642   | (F) TGCACCACCAACTGCTTAGC<br>(R) GGCATGGACTGTGGTCATGAG  |
| Interferon-induced<br>transmembrane<br>protein 1<br>(IFITM1) | Mus<br>musculus | NM_026820    | 50                 | 143-192   | (F) AAAAGCCGAGAGATGCCTAA<br>(R) GACCCAGTACAACCACCTC    |
| Interferon-induced<br>transmembrane<br>protein 2<br>(IFITM2) | Mus<br>musculus | NM_030694    | 62                 | 558-619   | (F) CGCGTATGCAAATGTTACCT<br>(R) ACCCCGTGCACTTTATTGA    |
| Interferon-induced<br>transmembrane<br>protein 3<br>(IFITM3) | Mus<br>musculus | NM_025378    | 57                 | 476-532   | (F) TCATCATTGTTCTTAACGCTCA<br>(R) CGGAAGTCGGAATCCTCTAT |
| IL-1B                                                        | Mus<br>musculus | NM_008361    | 98                 | 360-457   | (F) GAAGAAGAGCCCATCCTCTG<br>(R) TCATCTCGGAGCCTGTAGTG   |
| IL-6                                                         | Mus<br>musculus | NM_031168    | 108                | 118-225   | (F) AGTCCGGAGAGGAGACTTCA<br>(R) ATTTCCACGATTTCCAGAG    |
| NF- $\kappa$ B1                                              | Mus<br>musculus | NM_008689    | 114                | 1941-2054 | (F) CATCCACCATGGAAGACAAG<br>(R) TCACTGCGTAGTCGAAAAGG   |
| NF- $\kappa$ B2                                              | Mus<br>musculus | NM_019408    | 126                | 997-1122  | (F) ATCTCCCGAATGGACAAGAC<br>(R) TTGCCATCCATTCTCATCAT   |
| Schnurri-2                                                   | Mus<br>musculus | NM_010437    | 82                 | 5774-5855 | (F) CACCTTCAAATCCTCCGTTT<br>(R) CGTGGTCTTGGTGTTCATC    |
| Beta actin                                                   | Mus<br>musculus | NM_007393    | 95                 | 955-1049  | (F) CCTCTATGCCAACACAGTGC<br>(R) TGCTAGGAGCCAGAGCAGTA   |
| Cyclophilin                                                  | Mus<br>musculus | NM_008907    | 63                 | 383-445   | (F) CTGCACTGCCAAGACTGAAT<br>(R) CCTTCTTTCACCTTCCCAA    |

|             |                |              |     |           |                                                       |
|-------------|----------------|--------------|-----|-----------|-------------------------------------------------------|
| GAPDH       | Mus musculus   | NM_008084    | 64  | 431-494   | (F) CATGTTTGTGATGGGTGTGA<br>(R) TGCATTGCTGACAATCTTGA  |
| IL-1B       | Macaca mulatta | NM_001042756 | 115 | 217-331   | (F) AAGCTAAGGAAGATGCTGGT<br>(R) CGTTATTGCGTGTGTGCGAGG |
| IL-6        | Macaca mulatta | NM_001042733 | 50  | 419-468   | (F) CCAGAGCTGTGCAAATGAGT<br>(R) TTTCTGCAGGAACTGGATCA  |
| NF-κB1      | Macaca mulatta | NM_001266053 | 143 | 481-623   | (F) CACTGTGAGGATGGGATCTG<br>(R) CCCCTTATACACGCCTCTGT  |
| NF-κB2      | Macaca mulatta | XM_001104566 | 122 | 890-1011  | (F) TCTCGAATGGACAAGACAGC<br>(R) TGCCATCCATTCTCATCATC  |
| Schnurri-2  | Macaca mulatta | XM_001092694 | 54  | 6509-6562 | (F) CGGAGGGTCCTGATGACTAT<br>(R) GTTGCTGAGAGTGGAGTGGA  |
| Beta actin  | Macaca mulatta | NM_001033084 | 101 | 1087-1187 | (F) GATGTGGATCAGCAAGCA<br>(R) AGAAAGGGTGTAACGCAACTA   |
| Cyclophilin | Macaca mulatta | NM_001032809 | 126 | 76-201    | (F) GCAGACAAGGTTCCAAAG<br>(R) GAAGTCACCACCCTGACAC     |
| GAPDH       | Macaca mulatta | XM_001105471 | 93  | 527-619   | (F) TGCACCACCAACTGCTTAGC<br>(R) AGTGATGGCGTGGACTGTG   |

**Table S3. Table of poly(I:C)-exposed pregnant mice and outcomes.**

| <b>Gestational Exposure Time Frame</b> | <b>Injection</b> | <b>Injected Pregnant Mice (n)</b> | <b>Not pregnant or no pups (n)</b> | <b>Mothers that cannabilized pups (n)</b> | <b>Mothers with failure to thrive pups (n)</b> | <b>Mothers with healthy pups (n)</b> | <b>Mean offspring per mother (SD)<sup>a</sup></b> | <b>Total male offspring studied (n)<sup>b</sup></b> | <b>Total female offspring studied (n)<sup>b</sup></b> |
|----------------------------------------|------------------|-----------------------------------|------------------------------------|-------------------------------------------|------------------------------------------------|--------------------------------------|---------------------------------------------------|-----------------------------------------------------|-------------------------------------------------------|
| E11-13                                 | Poly(I:C)        | 12                                | 2                                  | 1                                         | 2                                              | 7                                    | 6.9 (2.0)                                         | 7                                                   | 7                                                     |
| E11-13                                 | Normal Saline    | 12                                | 3                                  | 0                                         | 1                                              | 8                                    | 6.5 (1.1)                                         | 7                                                   | 7                                                     |
| E15-17                                 | Poly(I:C)        | 12                                | 2                                  | 0                                         | 0                                              | 10                                   | 5.3 (1.8)                                         | 8                                                   | 8                                                     |
| E15-17                                 | Normal Saline    | 12                                | 3                                  | 1                                         | 0                                              | 8                                    | 5.4 (1.7)                                         | 8                                                   | 8                                                     |

<sup>a</sup>The mean number of offspring per mother with healthy pups did not differ between poly(I:C)-injected mothers and normal saline-injected mothers at E11-13 ( $t_{13}=0.43$ ,  $p=.67$ ) or E15-17 ( $t_{14}=0.15$ ,  $p=.89$ ). <sup>b</sup>Only one male and/or female offspring per injected mother was included in the study.



**Supplemental Table S4. Effects of maternal immune activation on immune system-related mRNA levels in the frontal cortex of adult offspring**

| Immune Marker | <i>E11-13 Maternal Injections</i> |                     |        | <i>E15-17 Maternal Injections</i> |                   |        |
|---------------|-----------------------------------|---------------------|--------|-----------------------------------|-------------------|--------|
|               | Normal Saline                     | Poly(I:C)           | T test | Normal Saline                     | Poly(I:C)         | T test |
| IFITM1        |                                   |                     |        |                                   |                   |        |
| <i>Male</i>   | 0.00101 ± 0.00027                 | 0.00094 ± 0.00021   | p=.64  | 0.00108 ± 0.00012                 | 0.00106 ± 0.00021 | p=.77  |
| <i>Female</i> | 0.00092 ± 0.00019                 | 0.00091 ± 0.00014   | p=.89  | 0.00094 ± 0.00029                 | 0.00087 ± 0.00015 | p=.55  |
| <i>All</i>    | 0.00096 ± 0.00023                 | 0.00093 ± 0.00017   | p=.63  | 0.00101 ± 0.00023                 | 0.00096 ± 0.00020 | p=.53  |
| IFITM2        |                                   |                     |        |                                   |                   |        |
| <i>Male</i>   | 0.00065 ± 0.00017                 | 0.00060 ± 0.00014   | p=.53  | 0.00065 ± 0.00009                 | 0.00066 ± 0.00015 | p=.89  |
| <i>Female</i> | 0.00063 ± 0.00008                 | 0.00066 ± 0.00012   | p=.52  | 0.00067 ± 0.00012                 | 0.00067 ± 0.00008 | p=.95  |
| <i>All</i>    | 0.00064 ± 0.00013                 | 0.00063 ± 0.00013   | p=.85  | 0.00066 ± 0.00010                 | 0.00067 ± 0.00012 | p=.88  |
| IFITM3        |                                   |                     |        |                                   |                   |        |
| <i>Male</i>   | 0.0134 ± 0.0015                   | 0.0125 ± 0.0022     | p=.37  | 0.0141 ± 0.0018                   | 0.0139 ± 0.0019   | p=.86  |
| <i>Female</i> | 0.0148 ± 0.0040                   | 0.0138 ± 0.0015     | p=.57  | 0.0143 ± 0.0020                   | 0.0141 ± 0.0018   | p=.87  |
| <i>All</i>    | 0.0141 ± 0.0015                   | 0.0131 ± 0.0019     | p=.33  | 0.0142 ± 0.0018                   | 0.0140 ± 0.0018   | p=.80  |
| IL-1B         |                                   |                     |        |                                   |                   |        |
| <i>Male</i>   | 0.000069±0.000021                 | 0.000069 ± 0.000017 | p=.99  | 0.000068±0.000028                 | 0.000080±0.000029 | p=.42  |
| <i>Female</i> | 0.000091±0.000077                 | 0.000065 ± 0.000016 | p=.39  | 0.000063±0.000011                 | 0.000053±0.000012 | p=.09  |
| <i>All</i>    | 0.000080±0.000055                 | 0.000067 ± 0.000016 | p=.40  | 0.000066±0.000020                 | 0.000066±0.000026 | p=.94  |
| IL-6          |                                   |                     |        |                                   |                   |        |
| <i>Male</i>   | 0.000017±0.000005                 | 0.000015±0.000005   | p=.57  | 0.000016±0.000004                 | 0.000016±0.000007 | p=.99  |
| <i>Female</i> | 0.000017±0.000007                 | 0.000014±0.000006   | p=.49  | 0.000015±0.000003                 | 0.000016±0.000005 | p=.99  |
| <i>All</i>    | 0.000017±0.000006                 | 0.000015±0.000005   | p=.35  | 0.000016±0.000004                 | 0.000016±0.000006 | p=.99  |
| NK-κB1        |                                   |                     |        |                                   |                   |        |
| <i>Male</i>   | 0.0046 ± 0.0005                   | 0.0045 ± 0.0003     | p=.65  | 0.0046 ± 0.0003                   | 0.0045 ± 0.0005   | p=.63  |
| <i>Female</i> | 0.0047 ± 0.0002                   | 0.0045 ± 0.0003     | p=.26  | 0.0044 ± 0.0006                   | 0.0044 ± 0.0002   | p=.73  |
| <i>All</i>    | 0.0047 ± 0.0004                   | 0.0045 ± 0.0003     | p=.30  | 0.0045 ± 0.0005                   | 0.0044 ± 0.0003   | p=.56  |
| NK-κB2        |                                   |                     |        |                                   |                   |        |
| <i>Male</i>   | 0.00098 ± 0.00014                 | 0.00099 ± 0.00009   | p=.94  | 0.00093 ± 0.00011                 | 0.00093 ± 0.00016 | p=.94  |
| <i>Female</i> | 0.00097 ± 0.00012                 | 0.00095 ± 0.00014   | p=.71  | 0.00090 ± 0.00019                 | 0.00089 ± 0.00011 | p=.93  |
| <i>All</i>    | 0.00098 ± 0.00013                 | 0.00097 ± 0.00011   | p=.82  | 0.00092 ± 0.00015                 | 0.00091 ± 0.00014 | p=.90  |
| Schnuri2      |                                   |                     |        |                                   |                   |        |
| <i>Male</i>   | 0.0795 ± 0.0157                   | 0.0779 ± 0.0112     | p=.84  | 0.0811 ± 0.0065                   | 0.0833 ± 0.0083   | p=.57  |
| <i>Female</i> | 0.0794 ± 0.0052                   | 0.0778 ± 0.0069     | p=.63  | 0.0794 ± 0.0121                   | 0.0778 ± 0.0044   | p=.73  |
| <i>All</i>    | 0.0794 ± 0.0112                   | 0.0779 ± 0.0089     | p=.69  | 0.0802 ± 0.0095                   | 0.0805 ± 0.0070   | p=.92  |

Values are mean ± standard deviation. Seven male and seven female offspring from the E11-13 maternal injections and eight male and eight female offspring from the E15-17 maternal injections were included in the study. IL-8 and interferon-β were not expressed at detectable levels in frontal cortex and were not quantified.
